Title: Ultra-high throughput multiplexing and sequencing of >500 bp amplicon regions on the Illumina HiSeq 2500 platform

Authors:

Johanna B. Holm<sup>1</sup>, Michael S. Humphrys<sup>1</sup>, Courtney K. Robinson<sup>1</sup>, Matthew L. Settles<sup>2</sup>, Sandra Ott<sup>1</sup>, Li Fu<sup>1</sup>, Hongqiu Yang<sup>1</sup>, Pawel Gajer<sup>1</sup>, Xin He<sup>3</sup>, Elias McComb<sup>1</sup>, Patti E Gravitt<sup>4</sup>, Khalil G. Ghanem<sup>5</sup>, Rebecca M. Brotman<sup>1</sup>, Jacques Ravel<sup>1\*</sup>

**Affiliations:**

<sup>1</sup> Institute for Genome Sciences and Department of Microbiology and Immunology, University of Maryland School of Medicine, Baltimore, Maryland.

<sup>2</sup> University of California, Davis Genome Center, Davis, California.

<sup>3</sup> Department of Epidemiology and Biostatistics, University of Maryland, School of Public Health, College Park, Maryland.

<sup>4</sup> Milken Institute School of Public Health, George Washington University, Washington, DC.

<sup>5</sup> Department of Medicine, Johns Hopkins School of Medicine, Baltimore, MD

\*Corresponding author: [javel@som.umaryland.edu](mailto:javel@som.umaryland.edu)

## 1 **Abstract**

2 Amplification, sequencing and analysis of the 16S rRNA gene affords characterization of  
3 microbial community composition. As this tool has become more popular and projects have  
4 grown in size and scope, greater sample multiplexing is becoming necessary while maintaining  
5 high quality sequencing. Here, modifications to the Illumina HiSeq 2500 platform are described  
6 that afford greater multiplexing and 300 bp paired-end reads of higher quality than produced by  
7 the current Illumina MiSeq platform. To improve the feasibility and flexibility of this method, a 2-  
8 Step PCR amplification protocol is also described that allows for targeting of different amplicon  
9 regions, thus improving amplification success from low bacterial bioburden samples.

10

## 11 **Importance**

12 Amplicon sequencing has become a popular and widespread tool for surveying microbial  
13 communities. Lower overall costs associated with higher throughput sequencing have made it a  
14 widely-adopted approach, especially for larger projects which necessitate higher sample  
15 multiplexing to eliminate batch effect and reduced time to acquire data. The method for  
16 amplicon sequencing on the Illumina HiSeq 2500 platform described here provides improved  
17 multiplexing capabilities while simultaneously producing greater quality sequence data and  
18 lower per sample cost relative to the Illumina MiSeq platform, without sacrificing amplicon  
19 length. To make this method more flexible to various amplicon targeted regions as well as  
20 improve amplification from low biomass samples, we also present and validate a 2-Step PCR  
21 library preparation method.

22

## 23 **Introduction**

24 The introduction of the Illumina HiSeq and MiSeq platforms has allowed for the characterization  
25 of microbial community composition and structure by enabling in-depth, paired-end sequencing  
26 of amplified fragments of the 16S rRNA gene. The Illumina MiSeq instrument produces paired  
27 sequence reads up to 300 bp long. However, low amplicon sequence diversity often results in  
28 reduced sequence read quality because of the homogenous signals generated across the entire  
29 flow cell [1]. The co-sequencing of PhiX DNA can alleviate the problem, but reduces the overall  
30 sequence read throughput and multiplexing options. Alternatively, the addition of a  
31 “heterogeneity spacer” in the amplification primer offsets the sequence reads by up to 7 bases  
32 and simultaneously increases multiplexing capacity by lowering the amount of PhiX control DNA  
33 to ~5% [1]. Lower overall costs associated with higher throughput sequencing have made it a  
34 widely-adopted approach, especially for larger projects which necessitate higher sample

35 multiplexing to eliminate batch effect and reduced time to acquire data. The high-throughput  
36 Illumina HiSeq 2500 platform offers a remedy to this issue but can currently only be used on  
37 short amplicons (i.e. the 16S rRNA gene V4 region) due to limitations in read length (maximum  
38 of 250 bp PE in Rapid Run Mode on a HiSeq 2500 instrument).

39  
40 We present here a method that produces high-quality 300 bp paired-end reads from up to 1,568  
41 samples per lane on a HiSeq 2500 instrument set to Rapid Run Mode. To make this method  
42 feasible and flexible in sequencing different amplicon regions, libraries are prepared using an  
43 improved version of a previously published 1-Step PCR method [1], by using a 2-Step PCR  
44 approach. In the 1-Step PCR method, fusion primers that contain both the target amplification  
45 primer, the heterogeneity spacer, the barcode, and the sequencing primers have been used to  
46 amplify a ready-to-sequence amplicon. However, primers ranging from 90-97 bp in length are  
47 expensive, can be subject to degradation leading to poor or no amplification from low biomass  
48 samples, and are limited to the targeted amplicon region. The 2-Step PCR library preparation  
49 procedure described here is relatively more flexible and improves amplification from low  
50 biomass samples because it uses short primers and a small anchor sequence to target the  
51 amplicon region of interest in the first amplification step. The barcode, heterogeneity spacer and  
52 sequencing primer sequences are introduced via the anchor sequence in a second round of  
53 PCR.

54  
55 To validate this method and its application to low biomass samples, we compared vaginal  
56 community state types [2] as defined by metataxonomic profiling of vaginal samples from late  
57 and post-reproductive age women [3] targeting the V3-V4 region of the 16S rRNA gene.  
58 Samples from each woman were prepared using the 1-Step PCR procedure [1] sequenced on  
59 the Illumina MiSeq platform, and the 2-Step PCR procedure sequenced on both the Illumina  
60 MiSeq and HiSeq platforms. We sought to evaluate if the within-woman vaginal community state  
61 types differ between methods.

62

## 63 **Materials & Methods**

### 64 *Late and post-reproductive age vaginal sample collection & genomic DNA extraction*

65 A total of 92 mid-vaginal ES swabs stored in Amies transport medium (Copan) as previously  
66 described [3] were utilized in this study. The use of these samples was approved by the  
67 University of Maryland Baltimore IRB. Samples were thawed on ice and vortexed briefly. A 0.5  
68 mL aliquot of the cell suspension was transferred to a FastPrep Lysing Matrix B (MP

69 Biomedicals) tube containing 0.5 mL of PBS (Invitrogen). A cell lysis solution containing 5  $\mu$ L  
70 lysozyme (10 mg/ml; EMD chemicals), 13  $\mu$ L mutanolysin (11,700 U/ml; Sigma Aldrich), and 3.2  
71  $\mu$ L lysostaphin (1 mg/ml; Ambi Products, LLC) was added and samples were incubated at 37°C  
72 for 30 min. Then, 10  $\mu$ L Proteinase K (20mg/ml; Invitrogen), 50  $\mu$ L 10% SDS (Sigma), and 2  $\mu$ L  
73 RNase A (10mg/ml; Invitrogen) were added and samples were incubated at 55°C for an  
74 additional 45 min. Cells were lysed by mechanical disruption on a FastPrep homogenizer at 6  
75 m/s for 40 s, and the lysate was centrifuged on a Zymo Spin IV column (Zymo Research).  
76 Lysates were further processed on the QIA Symphony platform using the QS DSP  
77 Virus/Pathogen Midi Kit (Qiagen) according to the manufacturer's recommendation. DNA  
78 quantification was carried out using the Quant-iT PicoGreen dsDNA assay (Invitrogen). Three  
79 separate sequencing libraries were constructed from each genomic DNA: one using the 1-Step  
80 16S rRNA gene V3-V4 regions PCR protocol described by Fadrosch *et al.* [1], and two using the  
81 2-Step 16S rRNA gene V3-V4 regions PCR protocol.

#### 82 *Sequencing library construction using 1-Step PCR*

83 Sequencing libraries were constructed by amplifying the 16S rRNA gene V3-V4 regions using  
84 the 1-Step PCR amplification protocol previously described [1]. Primer sequences ranged from  
85 90-97 bp depending on the length of the heterogeneity spacer (Table 1). Amplification was  
86 performed using Phusion Taq Master Mix (1X, ThermoFisher) with 3% DMSO, 0.4  $\mu$ M each  
87 primer, and 5  $\mu$ L of genomic DNA. Cycling conditions were as follows: initial denaturation at  
88 98°C for 30 s, 30 cycles of denaturation at 98°C for 15 s, annealing at 58°C for 15 s, and  
89 elongation at 72°C for 15 s, followed by a final elongation step at 72°C for 60 s. Amplicons were  
90 cleaned and normalized with the SequelPrep kit (Invitrogen) according to the manufacturer's  
91 recommendation.

#### 92 *Sequencing library construction using 2-Step PCR*

93 The following library preparation method is a modified version of a method provided by Illumina  
94 ([https://support.illumina.com/downloads/16s\\_metagenomic\\_sequencing\\_library\\_prepara](https://support.illumina.com/downloads/16s_metagenomic_sequencing_library_preparation.html)  
95 [tion.html](https://support.illumina.com/downloads/16s_metagenomic_sequencing_library_preparation.html)). The V3-V4 regions of 16S rRNA genes were first amplified from genomic DNA using  
96 primers that combine bacterial 338F or 806R sequences previously described [1], a  
97 heterogeneity spacer of 0-7 bp, and the Illumina sequencing primers (**Table 2, Step 1**). A single  
98 PCR master mix was used for all 16S rRNA gene amplifications as the primers do not contain  
99 barcode indices (**Figure 1**). Each PCR reaction contained 1X Phusion Taq Master Mix  
100 (ThermoFisher), Step 1 Forward and Reverse primers (0.4  $\mu$ M each, **Supplementary Table**  
101 **1a**), 3% DMSO, and 5  $\mu$ L of genomic DNA. PCR amplification was performed using the

102 following cycling conditions: an initial denaturation at 94°C for 3 min, 20 cycles of denaturation  
103 at 94°C for 30 s, annealing at 58°C for 30 s, and elongation at 72°C for 1 min, and a final  
104 elongation step at 72°C for 7 min. The resultant amplicons were diluted 1:20, and 1 µL was  
105 used in the second step PCR. This second amplification step introduced an 8 bp dual-index  
106 barcode to the 16S rRNA gene amplicons (**Supplementary Table 1b**), as well as the flow cell  
107 linker adaptors using primers containing a sequence that anneals to the Illumina sequencing  
108 primer sequence introduced in step 1 (**Table 2, Step 2** and **Supplementary Tables 1c and 1d**  
109 for full oligonucleotide sequences). Each primer was added to a final concentration of 0.4 µM in  
110 each sample specific reaction, along with Phusion Taq Master Mix (1X) and 3% DMSO. Phusion  
111 Taq Polymerase (ThermoFisher) was used with the following cycling conditions: an initial  
112 denaturation at 94°C for 30 s, 10 cycles consisting of denaturation at 94°C for 30 s, annealing at  
113 58°C for 30 s, and elongation at 72°C for 60 s, followed by a final elongation step at 72°C for 5  
114 min (**Figure 1**). Libraries were cleaned using 0.6X SPRI beads (Agencourt) and quantified  
115 using a Perkin Elmer LabChip GX Touch HT instrument.

116

#### 117 *Amplicon success scoring and pooling*

118 Prepared libraries were run on a 2% agarose E-Gel (ThermoFisher, Waltham, MA) and scored  
119 for their relative success after amplification (expected ~627 bp, amplicon + linker + spacer + all  
120 primer sequences). Based on the score from the gel, a volume of 5 µl, from successful samples,  
121 10 µl from partially success, and 15 µl from low success samples were pooled into an  
122 Eppendorf tube. Pooled amplicons were cleaned and normalized using the SequelPrep  
123 normalization kit (Life Technologies, Carlsbad, Ca), according to manufacturer's  
124 recommendations. The pooled samples were cleaned up with AMPure XP (Agencourt/Beckman  
125 Coulter, Brea, CA) beads following manufacturer's instructions and size selected around 600  
126 bp. After size-selection the DNA was eluted in water. To ensure proper size of PCR product the  
127 pooled libraries were run on Agilent TapeStation 2200 with a DNA1000 tape for quality  
128 assurance.

129

#### 130 *Sequencing by Illumina MiSeq and sequence data processing*

131 Libraries were sequenced on an Illumina MiSeq instrument using 600 cycles producing 2 x 300  
132 bp paired-end reads. The sequences were de-multiplexed using the dual-barcode strategy, a  
133 mapping file linking barcode to samples and `split_libraries.py`, a QIIME-dependent script [4]. The  
134 resulting forward and reverse fastq files were split by sample using the QIIME-dependent script  
135 `split_sequence_file_on_sample_ids.py`, and primer sequences were removed using TagCleaner

136 (version 0.16) [5]. Further processing followed the DADA2 Workflow for Big Data and dada2 (v.  
137 1.5.2) (<https://benjjneb.github.io/dada2/bigdata.html>, [6], **Supplementary File 1**). Forward and  
138 reverse reads were each trimmed using lengths of 255 bp and 225 bp, respectively, filtered to  
139 contain no ambiguous bases, trimmed at minimum quality score of two, and the maximum  
140 number of expected errors in a read set to 2. Reads were assembled and chimeras for the  
141 combined runs removed as per the dada2 protocol.

142

#### 143 *Sequencing by Illumina HiSeq and sequence data processing*

144 Libraries were sequenced on an Illumina HiSeq 2500 using Rapid Run chemistry and a 515 nm  
145 laser barcode reader (a required accessory), and loaded at 8 pmol with 20% diverse library.  
146 Paired-end 300 bp reads were obtained using a HiSeq Rapid SBS Kit v2 (2 x 250 bp, 500  
147 cycles kit) combined with a (2 x 50 bp, 100 cycles kit; alternatively, a single 500 bp kit plus 2 x  
148 50 bp kits can be used instead). Within the HiSeq Control Software, under the Run  
149 Configuration tab, within the Flow Cell Setup, the Reagent Kit Type was set to “HiSeq Rapid  
150 v2”, and the Flow Cell Type to “HiSeq Rapid Flow Cell v2”. Next, within Recipe, the Index Type  
151 was set to “Custom”, the Flow Cell Format to Paired End, and the Cycles set to “301”, “8”, “8”,  
152 “301”, for Read 1, Index 1, Index 2, and Read 2, respectively (**Supplementary File 2**). Instead  
153 of the standard sequencing primers, custom locked nucleic acid primers were used according to  
154 the Fluidigm Access Array User Guide Appendices B and C [7]. The sequences were de-  
155 multiplexed using the dual-barcode strategy, a mapping file linking barcode to samples  
156 (**Supplementary Table 1**), and split\_libraries.py, a QIIME-dependent script [4]. The resulting  
157 forward and reverse fastq files were split by sample using the QIIME-dependent script  
158 split\_sequence\_file\_on\_sample\_ids.py, and primer sequences were removed using TagCleaner  
159 (version 0.16) [5]. Further processing followed the DADA2 Workflow for Big Data and DADA2 (v.  
160 1.5.2) (<https://benjjneb.github.io/dada2/bigdata.html>, [6]). Forward and reverse reads were each  
161 trimmed using lengths of 255 and 225 bp, respectively, filtered to contain no ambiguous bases,  
162 a minimum quality score of two was imposed, with the maximum number of expected errors in a  
163 read set to 2. Reads were assembled and chimeras for the combined runs were removed as per  
164 the DADA2 protocol.

165 All sequence data are available from NCBI SRA under Accession number SRP159872.

166

#### 167 *Sequencing Quality Comparisons*

168 To compare the quality of a near-full run of sequences produced by the 2-Step PCR library  
169 preparation sequenced on either the Illumina MiSeq or HiSeq 2500 platforms, sample-specific

170 forward and reverse fastq files were analyzed and visualized in R version 3.4.4 (2018-03-15)  
171 using the qa function of the ShortRead package v 1.36.1 [8], data.table v 1.11.4 , and ggplot2 v  
172 3.0.0 [9]. Because quality scores were not normally distributed, a Mann-Whitney-Wilcoxon test  
173 was applied to test if differences in the quality scores per cycle differed between the two  
174 sequencing platforms (R Package: stats, Function: wilcox.test).

175

#### 176 *Amplification success of low bioburden late and post-reproductive age vaginal samples*

177 The success or failure of amplifying the 16S rRNA gene V3-V4 regions from low biomass  
178 vaginal samples of late and post-reproductive age women using the 1-Step or 2-Step protocols  
179 was measured by the presence or absence of an amplicon band using agarose gel  
180 electrophoresis after the final amplification (in the case of the 2-Step protocol, after the 2<sup>nd</sup> step).  
181 Samples successfully amplified using all three protocols were used for statistical analyses. To  
182 test for differences in the quality scores of samples prepared and sequenced by the different  
183 methods, a Kruskal-Wallis Rank Sum test was applied.

184

#### 185 *Distance-based bacterial community comparisons from low bioburden late and post-* 186 *reproductive vaginal samples*

187 The 1-Step library was sequenced on the Illumina MiSeq Platform and the 2-Step library was  
188 sequenced on both the Illumina MiSeq and HiSeq platforms. Sequences were quality-filtered  
189 and assembled as described above. For each of the three quality-filtered datasets, amplification  
190 sequence variants generated by DADA2 were individually taxonomically classified using the  
191 RDP Naïve Bayesian Classifier [10] trained with the SILVA v132 16S rRNA gene database [11].  
192 ASVs of major vaginal taxa were assigned species-level annotations using speciateIT (version  
193 2.0), a novel and rapid per sequence classifier (<http://ravel-lab.org/speciateIT>), and verified via  
194 BLASTn against the NCBI 16S rRNA reference database. Read counts for ASVs assigned to  
195 the same taxonomy were summed for each sample. To determine if library preparation methods  
196 influenced microbial community  $\beta$ -diversity, samples were assigned a vaginal community state  
197 type as defined by Jensen-Shannon distances and clustering via Ward linkage. Agreement of  
198 within-subject assigned CSTs between methods was determined using Fleiss' Kappa statistic  $\kappa$   
199 [12] (R package: irr v 0.84). Here  $\kappa = 0$  indicates all CST assignments were dissimilar between  
200 the libraries, and  $\kappa = 1$  indicates identical CST assignments. A  $\kappa > 0.75$  is considered excellent  
201 agreement.

## 202 **Results**

203 *Comparison of Illumina MiSeq and Illumina HiSeq amplicon sequencing read quality and*  
204 *quantity*

205 To compare the quality of amplicon reads produced via 2-Step PCR and the Illumina MiSeq and  
206 HiSeq platforms, each sequencing run was demultiplexed with the same mapping file, and the  
207 quality profiles were compared. Significantly greater mean quality scores were observed for  
208 1,536 samples run on the HiSeq platform compared to 444 samples run on the MiSeq platform  
209 ( $U = 3 \times 10^5$ ,  $p < 2.2 \times 10^{-16}$ , **Figure 2**). The HiSeq 2500 platform produced a greater mean  
210 number of quality-filtered sequences per sample than the MiSeq platform, with fewer chimeric  
211 sequences detected on average (**Table 3**). Additionally, the HiSeq 2500 sequencing strategy  
212 was more cost efficient for large sequencing projects at \$3.99 per sample, assuming 2 lanes are  
213 run with 1,568 multiplexed samples per lane (**Table 3**).

214 *2-Step PCR amplicon library preparation improves amplification success of low biomass vaginal*  
215 *samples*

216 Of 92 low-biomass vaginal samples collected from late and post-reproductive women, 54%  
217 were successfully amplified using the 1-Step PCR protocol, while the 2-Step protocol produced  
218 amplifications from 90% of samples (**Table 4**). Of 42 samples that did not amplify by the 1-Step  
219 method, 55% were over the age of 51, the average of menopause, and 34 successfully  
220 amplified using the 2-Step method, an 80% improvement (**Supplementary Table 2**). Amplicons  
221 were not observed from 8 samples regardless of protocol type, and 1 sample was successfully  
222 amplified using the 1-Step but not the 2-Step procedure. From all libraries, 1-3% of sequences  
223 were detected as chimeras and removed. This yielded on average 11,080 sequences per  
224 sample from the 1-Step library, 14,282 sequences per sample from the 2-Step library  
225 sequenced on the MiSeq platform, and 50,514 sequences per sample from the 2-Step library  
226 sequenced on the HiSeq platform. The 1-Step library consisted of 49 samples, of which 30 had  
227 > 500 total sequences and were used for comparative  $\beta$ -diversity analysis (**Table 4**).

228 Consistency of observed CSTs between libraries was tested by using Fleiss' *kappa* for inter-  
229 rater reliability, where  $\kappa > 0.75$  indicated excellent agreement. Complete agreement between all  
230 three methods was observed ( $\kappa = 1.0$ , **Figure 3**, raw read count taxonomy tables are available  
231 in Supplemental Table 3).

232

233 **Discussion**

234 Large sample sizes and within subject frequent sampling are now becoming the norm for  
235 microbiome analyses to increase statistical power. Therefore, higher-throughput capabilities are  
236 needed that do not sacrifice sequence quality, afford flexibility to target a diverse set of genes or



237 gene regions, and maintain the ability to sequence longer amplicons for increased taxonomic  
238 resolution. Additionally, the less than optimal read quality and per sample read counts  
239 generated by the Illumina MiSeq platform necessitated an improved method. The innovative use  
240 of the Illumina HiSeq 2500 platform presented here improves on current technologies by  
241 producing 300 bp PE reads of high quality and multiplexing of up to 1,568 samples per lane  
242 compared to samples multiplexed on an Illumina MiSeq instrument. This new approach affords  
243 a greater mean number of significantly higher quality sequences per sample with high  
244 multiplexing.

245  
246 The 2-Step PCR library preparation method described here allows for production of sequencing  
247 libraries from various gene targets and low biomass samples. Amplification success of low  
248 biomass samples prone to amplification difficulties was improved by 80% when this method was  
249 used instead of the traditional 1-Step PCR method. In addition to lower the cost of the shorter  
250 primers used in the 2-Step PCR library protocol, which do not require PAGE purification, the 2-  
251 Step PCR protocol represents a major improvement. Other investigators have reported the use  
252 of 16S rRNA gene fusion amplification primers that contain a universal 16S rRNA sequence, a  
253 barcode and sequencer specific adaptors have been previously used to generate large  
254 sequence datasets, including those related to the Human Microbiome Project [13, 14]. This 1-  
255 Step PCR library construction method suffers from low efficacy of amplification due to the long  
256 primer length, which is especially problematic in cases where template targets are in low  
257 abundance. A 2-Step PCR library construction wherein a barcode and sequencer specific  
258 adaptors sequences are added in a second highly efficient PCR step is preferable. This  
259 approach affords flexibility to target any regions of interest with minimal investment as only new  
260 primers for the first PCR of the 2-Step library preparation method are needed. Other low-  
261 biomass environments that could benefit from the 2-Step PCR procedure include blood and  
262 serum [15], respiratory airways [16], skin [17], sub-seafloor sediments [18], and clean rooms  
263 [19], among others.

264  
265 In summary, to demonstrate the comparability of sequence datasets produced via different  
266 methods, 16S rRNA gene V3-V4 regions sequence datasets were generated from low-biomass  
267 vaginal samples from late and post-reproductive age women using both 1-Step and 2-Step PCR  
268 library construction methods and the Illumina HiSeq and MiSeq sequencing platforms. Complete  
269 within-subject agreement between the vaginal community state type assignments [2] were  
270 observed between all three methods, though a greater number of significantly higher quality

271 sequences were obtained from the 2-Step PCR method sequenced on the Illumina HiSeq 2500  
272 platform. We therefore conclude that while the 2-Step PCR preparation method combined with  
273 the Illumina HiSeq 2500 platform is preferred, data generated by 1-Step or 2-Step PCR and  
274 sequenced on the Illumina MiSeq or HiSeq 2500 platform can still be combined to successfully  
275 obtain meaningful conclusions about the environment and sample types of interest.

276

277 Limitations:

278 The method is extremely high-throughput, and as such might not be suitable for small projects  
279 unless these are combined with other samples. Producing a large number of samples ready for  
280 pooling requires automation so that time from sample collection to data generation is still  
281 reasonable. Overall, automation is required, and this approach might be suitable for microbiome  
282 service cores where faster turn-around is needed and running many MiSeq runs is not a viable  
283 option.

284

## 285 **Acknowledgements**

286 JB Holm was supported by the National Institute of Allergy and Infectious Diseases of the  
287 National Institutes of Health under award number F32AI136400. Research reported in this  
288 publication was supported in part by the National Institute of Allergy and Infectious Diseases  
289 and the National Institute of Nursing Research of the National Institutes of Health under award  
290 numbers: U19AI084044, R01AI116799, R21AI107224, R01AI089878 and R01NR015495. The  
291 content is solely the responsibility of the authors and does not necessarily represent the official  
292 views of the National Institutes of Health.

293

## 294 **References**

- 295 1. Fadrosh DW, Ma B, Gajer P, Sengamalay N, Ott S, Brotman RM, Ravel J: **An**  
296 **improved dual-indexing approach for multiplexed 16S rRNA gene**  
297 **sequencing on the Illumina MiSeq platform.** In: *Microbiome*. vol. 2; 2014: 6.
- 298 2. Ravel J, Gajer P, Abdo Z, Schneider GM, Koenig SSK, McCulle SL, Karlebach S,  
299 Gorle R, Russell J, Tacket CO *et al*: **Vaginal microbiome of reproductive-age**  
300 **women.** In: *Proc Natl Acad Sci USA*. vol. 108 Suppl 1; 2011: 4680-4687.
- 301 3. Brotman RM, Shardell MD, Gajer P, Fadrosh D, Chang K, Silver MI, Viscidi RP,  
302 Burke AE, Ravel J, Gravitt PE: **Association between the vaginal microbiota,**  
303 **menopause status, and signs of vulvovaginal atrophy.** In: *Menopause*. vol.  
304 21; 2014: 450-458.
- 305 4. Kuczynski J, Stombaugh J, Walters WA, Gonzalez A, Caporaso JG, Knight R:  
306 **Using QIIME to analyze 16S rRNA gene sequences from microbial**  
307 **communities.** *Current protocols in microbiology* 2012, **Chapter 1**:Unit 1E 5.

- 308 5. Schmieder R, Lim YW, Rohwer F, Edwards R: **TagCleaner: Identification and**  
309 **removal of tag sequences from genomic and metagenomic datasets.** *Bmc*  
310 *Bioinformatics* 2010, **11**:341.
- 311 6. Callahan BJ, McMurdie PJ, Rosen MJ, Han AW, Johnson AJ, Holmes SP:  
312 **DADA2: High-resolution sample inference from Illumina amplicon data.**  
313 *Nature methods* 2016, **13**(7):581-583.
- 314 7. Fluidigm: **Access Array System for Illumina Sequencing Systems.** In.; 2018:  
315 61-68.
- 316 8. Morgan M, Anders S, Lawrence M, Aboyoun P, Pages H, Gentleman R:  
317 **ShortRead: a bioconductor package for input, quality assessment and**  
318 **exploration of high-throughput sequence data.** *Bioinformatics* 2009,  
319 **25**(19):2607-2608.
- 320 9. Wickham H: **Ggplot2 : elegant graphics for data analysis.** New York: Springer;  
321 2009.
- 322 10. Wang Q, Garrity GM, Tiedje JM, Cole JR: **Naive Bayesian Classifier for Rapid**  
323 **Assignment of rRNA Sequences into the New Bacterial Taxonomy.** In:  
324 *Applied and Environmental Microbiology.* vol. 73; 2007: 5261-5267.
- 325 11. Quast C, Pruesse E, Yilmaz P, Gerken J, Schweer T, Yarza P, Peplies J,  
326 Glöckner FO: **The SILVA ribosomal RNA gene database project: improved**  
327 **data processing and web-based tools.** In: *Nucleic Acids Res.* vol. 41; 2013:  
328 D590-596.
- 329 12. Fleiss JL: **Measuring nominal scale agreement among many raters.**  
330 *Psychological bulletin* 1971, **76**(5):378.
- 331 13. Consortium THMP: **Structure, function and diversity of the healthy human**  
332 **microbiome.** In., vol. 486; 2012: 207-214.
- 333 14. Sinha R, Abnet CC, White O, Knight R, Huttenhower C: **The microbiome**  
334 **quality control project: baseline study design and future directions.** In:  
335 *Genome Biol.* Genome Biology; 2015: 1-6.
- 336 15. Santiago A, Pozuelo M, Poca M, Gely C, Nieto JC, Torras X, Roman E, Campos  
337 D, Sarrabayrouse G, Vidal S *et al*: **Alteration of the serum microbiome**  
338 **composition in cirrhotic patients with ascites.** *Sci Rep* 2016, **6**:25001.
- 339 16. Goleva E, Jackson LP, Harris JK, Robertson CE, Sutherland ER, Hall CF, Good  
340 JT, Jr., Gelfand EW, Martin RJ, Leung DY: **The effects of airway microbiome**  
341 **on corticosteroid responsiveness in asthma.** *Am J Respir Crit Care Med*  
342 2013, **188**(10):1193-1201.
- 343 17. Byrd AL, Belkaid Y, Segre JA: **The human skin microbiome.** *Nat Rev Microbiol*  
344 2018, **16**(3):143-155.
- 345 18. Fry JC, Parkes RJ, Cragg BA, Weightman AJ, Webster G: **Prokaryotic**  
346 **biodiversity and activity in the deep seafloor biosphere.** *FEMS Microbiol*  
347 *Ecol* 2008, **66**(2):181-196.
- 348 19. Vaishampayan P, Probst AJ, La Duc MT, Bargoma E, Benardini JN, Andersen  
349 GL, Venkateswaran K: **New perspectives on viable microbial communities in**  
350 **low-biomass cleanroom environments.** *ISME J* 2013, **7**(2):312-324.

351

352

Table 1. 1-Step PCR Method Primers (5' → 3')

|                | <b>Illumina MiSeq 3' Flowcell Linker + Illumina 5' Sequencing Primer (CS1/CS2) + Index + Heterogeneity Spacer + 16S rRNA Gene V3-V4 Primer</b> |
|----------------|------------------------------------------------------------------------------------------------------------------------------------------------|
| Forward Primer | AATGATACGGCGACCACCGAGATCTACAC + GTGACTGGAGTTCAGACGTGTGCTCTTCCGATCT + Index (8 bp) + Heterogeneity Spacer (0-7 bp) + ACTCCTRCGGGAGGCAGCAG       |
| Reverse Primer | CAAGCAGAAGACGGCATAACGAGAT + AACTCTTTCCCTACACGACGCTCTTCCGATCT + Index (8 bp) + Heterogeneity Spacer (0-7 bp) + GGACTACHVGGGTWTCTAAT             |

353

Table 2. 2-Step Protocol PCR Primers (5' → 3')

| <b>Step 1*</b>  | <b>Illumina 5' Sequencing Primer (CS1/CS2) + Heterogeneity Spacer + 16S rRNA Gene V3-V4 Primer</b> |
|-----------------|----------------------------------------------------------------------------------------------------|
| Forward Primer  | ACACTGACGACATGGTTCTACA + Heterogeneity Spacer (0-7 bp) + ACTCCTRCGGGAGGCAGCAG                      |
| Reverse Primer  | TACGGTAGCAGAGACTTGGTCT + Heterogeneity Spacer (0-7 bp) + GGACTACHVGGGTWTCTAAT                      |
| <b>Step 2**</b> | <b>Illumina 3' Flowcell Linker + Index + CS1/CS2 Complement</b>                                    |
| Forward Primer  | AATGATACGGCGACCACCGAGATCTACAC + INDEX (8 bp) + AACTGACGACATGGTTCTACA                               |
| Reverse Primer  | CAAGCAGAAGACGGCATAACGAGAT + INDEX (8 bp) + TACGGTAGCAGAGACTTGGTCT                                  |

\*See Supplementary Table 1b for full oligonucleotide sequences

\*\*See Supplementary Tables 1c & 1d for full forward and reverse oligonucleotides, respectively

354

Table 3. Sequencing run information for the MiSeq and HiSeq platforms.

| Sequencing Platform                                        | <b>MiSeq</b>  | <b>HiSeq 2500 RR</b>  |
|------------------------------------------------------------|---------------|-----------------------|
| Run Details                                                | 2 x 300 bp PE | 2 x 250 bp + 2 x 50bp |
| Mean No. Assembled Sequences per Sample ± SE               | 14,774 ± 503  | 52,142 ± 4750         |
| No. Samples in Sequencing Run                              | 444           | 1,536                 |
| Mean Quality Score per Sample ± SE                         | 27.2 ± 0.3*   | 34.6 ± 0.2*           |
| Mean No. Reads per Sample Pre-QC ± SE                      | 22,880 ± 2006 | 58,034 ± 1040         |
| Mean No. Reads per Sample Post-QC ± SE                     | 9,938 ± 1042  | 47,307 ± 848          |
| % Chimeric Sequences Detected                              | 10.8          | 7.8                   |
| Mean No. Non-chimeric, Assembled Sequences per Sample ± SE | 8,383 ± 825   | 42,978 ± 735          |
| Cost of Sequencing per Sample (No. Multiplexed Samples)    | \$6.38 (384)  | \$3.99 (1,568)        |

\* Significant. Wilcoxon Rank Sum  $W = 3 \times 10^5$ ,  $p < 2.2 \times 10^{-16}$

355

Table 4. Summary of sequencing results for low-bioburden, late and post-reproductive age vaginal samples

| Library Preparation Method                                     | 1-Step            | 2-Step            |                   |
|----------------------------------------------------------------|-------------------|-------------------|-------------------|
| No. samples attempted to amplify                               | 92                | 92                |                   |
| No. samples amplified                                          | 49                | 83                |                   |
| Sequencing Platform                                            | MiSeq             | MiSeq             | HiSeq             |
| % Chimeric Sequences Detected                                  | 0.70              | 3.3               | 3.1               |
| Mean No. Non-chimeric, Assembled Sequences per Sample $\pm$ SE | 11,080 $\pm$ 1506 | 14,282 $\pm$ 483  | 50,514 $\pm$ 4427 |
| Median Quality Score per Sample [Q1-Q3]                        | 36.2 [33.5-37.2]* | 34.9 [29.9-36.3]* | 37.1 [33.0-38.0]* |

\*Significant. Kruskal-Wallis H = 187.85,  $p < 2.2 \times 10^{-16}$

356

357

358

359

### Step 1 - Target PCR

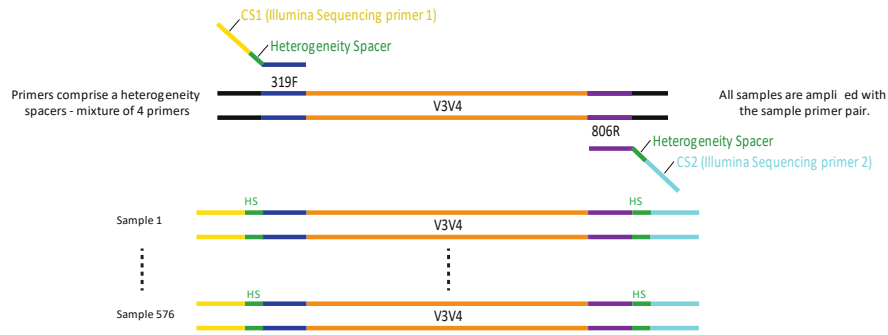

### Step 2 - Barcoding PCR

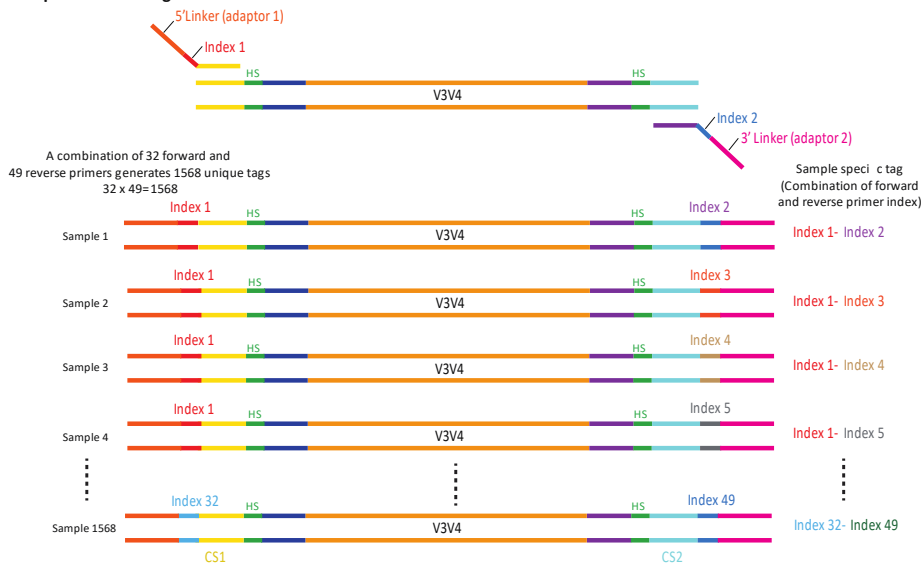

### Sequencing 300 PE

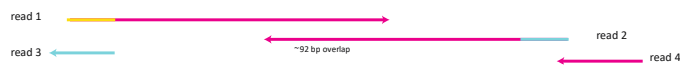

Figure 1. Illumina amplicon library preparation through 2-Step PCR amplification.

360

361

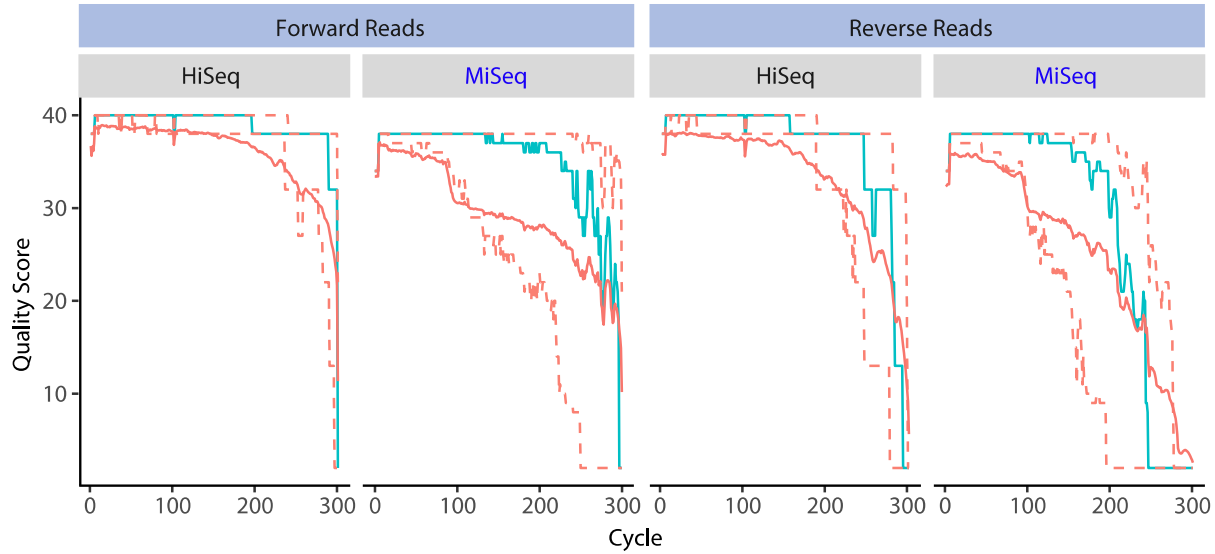

362

Figure 2. Forward and reverse read quality profiles for 300 cycles on the Illumina HiSeq (1,536 samples) and MiSeq (444 samples) platforms. Amplicon libraries were prepared using a 2-Step PCR method. Shown for each cycle are the mean quality score (green line), the median quality score (solid orange line), the quartiles of the quality score distribution (dotted orange lines).

363

364

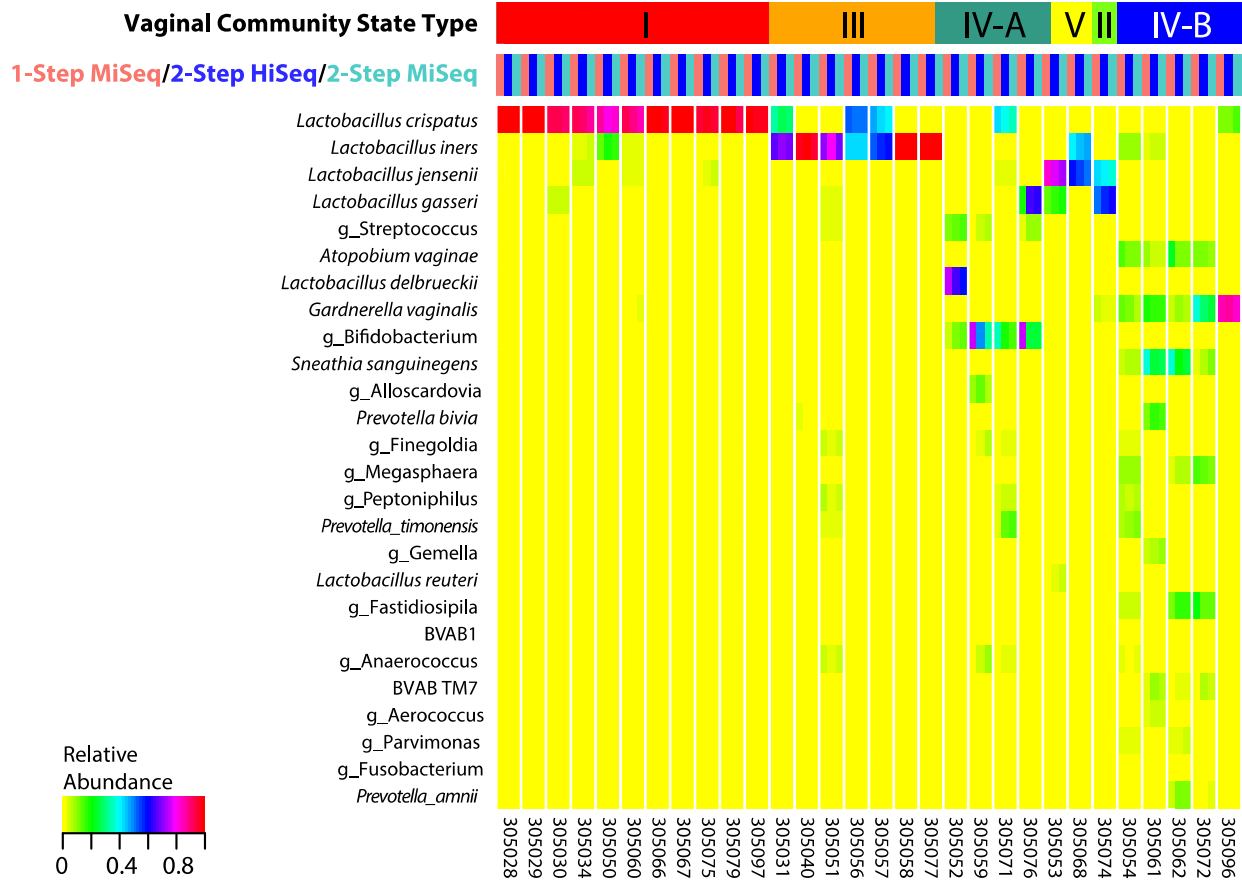

Figure 3. Heatmap of taxon relative abundances (rows) of samples (columns). Subject samples are separated by white lines and samples are ordered by vaginal community state types and as follows: 1-Step MiSeq (pink), 2-Step HiSeq (blue), 2-Step MiSeq (aqua).
